# Supplementary material for: Reconciling the strategic goals of irrigated food production, energy production with environmental flows under water transfer project in the Yellow River Basin
Source: Copernicus journal article supplement (doi:10.5194/egusphere-2024-3393), 2024-11-11
Supplement: Supplementary file 1 [file egusphere-2024-3393-supplement.pdf]

## **Supplementary Information**

# **Reconciling the strategic goals of irrigated food production, energy production with environmental flows under water transfer project in the Yellow River Basin**

Yichu Huang<sup>1,2</sup>, Xiaoming Feng<sup>1,2\*</sup>, Chaowei Zhou<sup>1,2</sup>, Bojie Fu<sup>1,2,3</sup>

<sup>1</sup>State Key Laboratory of Urban and Regional Ecology, Research Center for Eco-Environmental Sciences, Chinese Academy of Sciences, Beijing 100085, China

<sup>2</sup>University of Chinese Academy of Sciences, Beijing 100049, China

<sup>3</sup>Faculty of Geographical Science, Beijing Normal University, Beijing 100875, China

*Corresponding to:* Xiaoming Feng ([fengxm@rcees.ac.cn](mailto:fengxm@rcees.ac.cn))

**Table S1.** Costs, capacity factor and water intensity of energy technologies implemented in the model. Sources: ①\*Vinca et al., 2020; \*\*Webster et al., 2013; \*\*\*Parkinson et al., 2016. ②\*Vinca et al., 2020; \*\*Ye, 2013. ③\*Liu et al., 2018; \*\*Vinca et al., 2020.④\*Parkinson et al., 2016; \*\*Liao et al., 2021; \*\*\*Vinca et al., 2020. ST: Single-cycle, CC: Combined-cycle. OT: Once-through freshwater cooling, CL: Closed-loop freshwater cooling, AC: Air-cooled.

| Technology                  | Investment cost<br>[\$/kW]① | Fixed cost<br>[\$/kW]② | Variable cost<br>[\$/kWh]② | Capacity Factor③ | Water consumption<br>[m <sup>3</sup> /MWh]④ |
|-----------------------------|-----------------------------|------------------------|----------------------------|------------------|---------------------------------------------|
| Coal st cl                  | 2945**                      | 24*                    | 0.04861*                   | 0.54*            | 1.93**                                      |
| Coal st ac                  | 3059**                      | 25*                    | 0.05396*                   | 0.54*            | -*                                          |
| Gas st cl                   | 1205*                       | 17*                    | 0.04861*                   | 0.34*            | 2.10*                                       |
| Gas st ac                   | 1251*                       | 18*                    | 0.05396*                   | 0.34*            | -*                                          |
| Gas gt                      | 676*                        | 7*                     | 0.12222*                   | 0.34*            | -*                                          |
| Gas cc ot                   | 1023*                       | 15*                    | 0.03611*                   | 0.34*            | 0.50*                                       |
| Gas cc cl                   | 1064*                       | 16*                    | 0.03687*                   | 0.34*            | 0.60*                                       |
| Gas cc ac                   | 1105*                       | 17*                    | 0.03726*                   | 0.34*            | -*                                          |
| Geothermal<br>cl            | 6343*                       | 135*                   | 0.02500*                   | 0.90**           | 0.71*                                       |
| Hydro                       | 5000*                       | 15*                    | 0.00700**                  | 0.41*            | -*                                          |
| IGCC cl                     | 4131*                       | 32*                    | 0.07917*                   | 0.90**           | 1.47**                                      |
| Solar pv                    | 3873***                     | 30**                   | 0.00042**                  | 0.18*            | -*                                          |
| Wind                        | 2213***                     | 44**                   | 0.01400**                  | 0.22*            | -*                                          |
| Electricity<br>distribution | 1120*                       | 36*                    | 0.03472*                   | 0.90**           | -***                                        |

**Table S2.** Costs and irrigation efficiency for irrigation technologies implemented in the model. Sources: ①Vinca et al., 2020. ②Rosa, 2022.

| Technology | Investment cost<br>[\$/ha] ① | Fixed cost<br>[\$/ha] ① | Variable cost<br>[\$/(ha month)] ① | Irrigation<br>efficiency② |
|------------|------------------------------|-------------------------|------------------------------------|---------------------------|
| Flood      | 460                          | 10                      | 14                                 | 0.7                       |
| Drip       | 2600                         | 52                      | 78                                 | 0.88                      |
| Sprinkler  | 1625                         | 33                      | 49                                 | 0.7                       |

**Table S3.** Costs for crops implemented in the model. Source: Food and Agriculture Organization (FAO).

| Crops  | Investment<br>cost<br>[\$/ha] | Fixed cost [\$ /ha] | Variable cost [\$/ (ha<br>month)] |
|--------|-------------------------------|---------------------|-----------------------------------|
| Wheat  | 341                           | 36                  | 72                                |
| Maize  | 1000                          | 20                  | 30                                |
| Rice   | 716                           | 15                  | 22                                |
| Cotton | 416                           | 9                   | 13                                |
| Pulses | 1320                          | 26.4                | 39.6                              |

**Table S4.** Costs for water diversion and treatment technologies implemented in the model. Source: Vinca et al., 2020. GW: groundwater, SW: surface water.

| Technology                    | Investment cost<br>[\$/(mq/day)] | Fixed cost [\$(mq/day)] |
|-------------------------------|----------------------------------|-------------------------|
| Industry gw diversion         | 20                               | 8.5                     |
| Industry sw diversion         | 57                               | 3                       |
| Industry wastewater recycling | 1350                             | 99                      |
| Industry wastewater treatment | 431                              | 37                      |
| Irrigation gw diversion       | 8.5                              | 1                       |
| Irrigation sw diversion       | 57                               | 3                       |
| Rural gw diversion            | 8.5                              | 1                       |
| Rural piped distribution      | 326                              | 18                      |
| Rural sw diversion            | 57                               | 3                       |
| Rural wastewater recycling    | 1350                             | 99                      |
| Rural wastewater treatment    | 759                              | 77                      |
| Urban gw diversion            | 20                               | 8.5                     |
| Urban piped distribution      | 1013                             | 252                     |
| Urban sw diversion            | 57                               | 3                       |
| Urban wastewater collection   | 785                              | 251                     |
| Urban wastewater irrigation   | 1350                             | 99                      |
| Urban wastewater recycling    | 1350                             | 99                      |
| Urban wastewater treatment    | 431                              | 37                      |

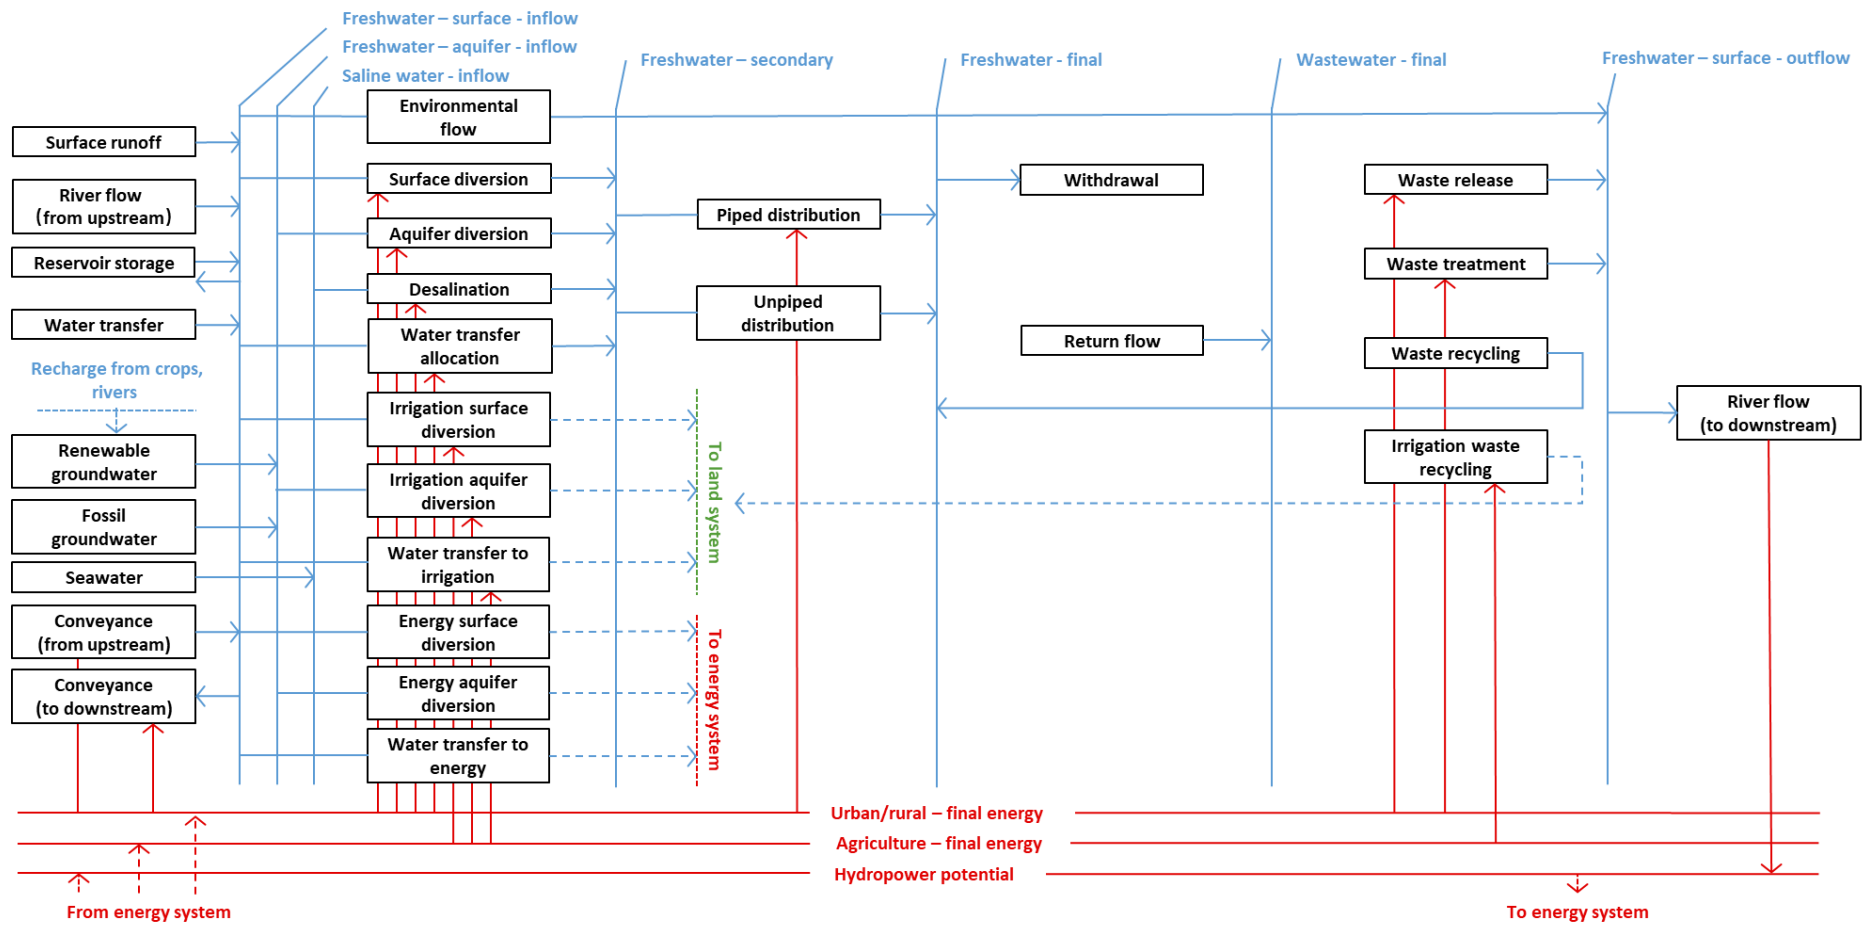

**Figure S1.** The water sector representation in each BPU using the MESSAGEix reference system scheme. The water sector is hard linked to the energy and land sector representations using the indicated interactions (Adapted from Vinca et al., 2020).

## References

Liao, X., Huang, L., Xiong, S., and Ma, X.: Optimizing future electric power sector considering water-carbon policies in the water-scarce North China Grid, *Sci. Total Environ.*, 768, 144865, <https://doi.org/10.1016/j.scitotenv.2020.144865>, 2021.

Liu, K., He, G., Wang, J., Zhao, J., and Luan, F.: Low carbon planning and economic analysis for China's power sector towards 2030 (in Chinese), *Energy Conserv. Technol.*, 36, 263–269, [https://doi.org/1002-6339\(2018\)03-0263-07](https://doi.org/1002-6339(2018)03-0263-07), 2018.

Parkinson, S. C., Djilali, N., Krey, V., Fricko, O., Johnson, N., Khan, Z., Sedraoui, K., and Almasoud, A. H.: Impacts of Groundwater Constraints on Saudi Arabia's Low-Carbon Electricity Supply Strategy, *Environ. Sci. Technol.*, 50, 1653–1662, <https://doi.org/10.1021/acs.est.5b05852>, 2016.

Rosa, L.: Adapting agriculture to climate change via sustainable irrigation: biophysical potentials and feedbacks, *Environ. Res. Lett.*, 17, 063008, <https://doi.org/10.1088/1748-9326/ac7408>, 2022.

Vinca, A., Parkinson, S., Byers, E., Burek, P., Khan, Z., Krey, V., Diuana, F. A., Wang, Y., Ilyas, A., Köberle, A. C., Staffell, I., Pfenninger, S., Muhammad, A., Rowe, A., Schaeffer, R., Rao, N. D., Wada, Y., Djilali, N., and Riahi, K.: The NEXUS Solutions Tool (NEST) v1.0: an open platform for optimizing multi-scale energy–water–land system transformations, *Geosci. Model Dev.*, 13, 1095–1121, <https://doi.org/10.5194/gmd-13-1095-2020>, 2020.

Webster, M., Donohoo, P., and Palmintier, B.: Water–CO<sub>2</sub> trade-offs in electricity generation planning, *Nat. Clim. Change*, 3, 1029–1032, <https://doi.org/10.1038/NCLIMATE2032>, 2013.

Ye, M.: Simulation of Emission Control Policies for China's Power Sector Using a Multi-Regional Bottom-up Optimization Model (in Chinese), Tsinghua University, Beijing, China, 2013.
