# Supplementary material for: Reconciling the strategic goals of irrigated food production, energy production with environmental flows under water transfer project in the Yellow River Basin
Source: Copernicus journal article supplement (doi:10.5194/egusphere-2024-3393), 2024-11-11
Supplement: Supplementary file [file egusphere-2024-3393-AC1-supplement.pdf]

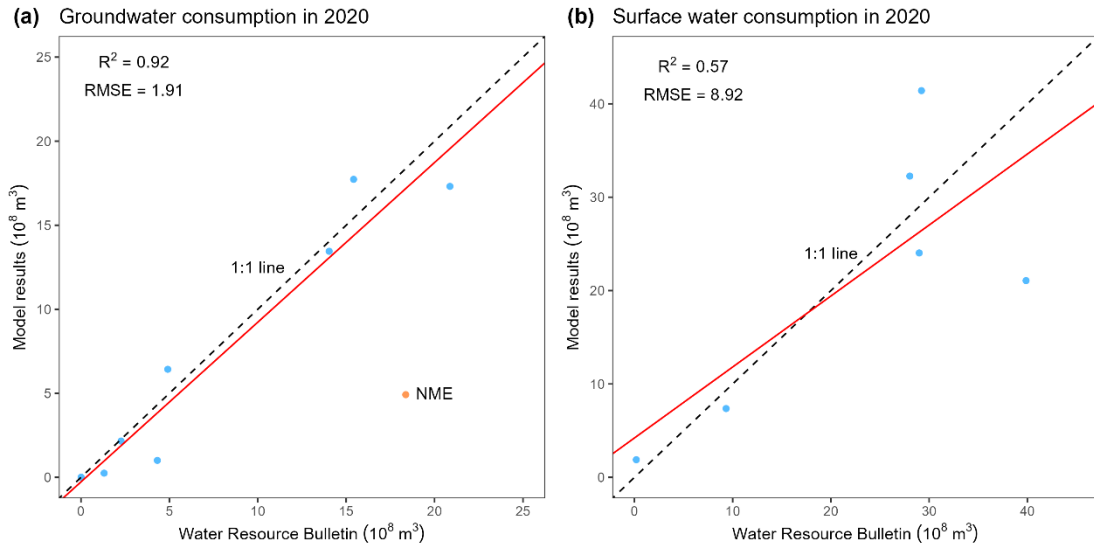

Figure 1. Comparison of (a) groundwater consumption and (b) surface water consumption under the EFs scenario in 2020 at the provincial level. The validation results for groundwater consumption are reliable, except for NME. For surface water consumption, the validation excludes NME, HNA, and SDO, where significant deviations are observed. The discrepancy arises because the bulletin covers entire administrative regions of the three provinces, while this study only includes areas within the Yellow River Basin boundary.

Table 1. Data source and calibration data.

| <b>Data</b>                 | <b>Source</b>                                           | <b>Time span</b> | <b>Time resolution</b> | <b>Spatial resolution</b> | <b>Calibration data</b> |
|-----------------------------|---------------------------------------------------------|------------------|------------------------|---------------------------|-------------------------|
| Irrigation water use        | Khan et al., 2023                                       | 2010-2050        | Month                  | 0.5°                      | Zhou et al., 2020       |
| Industry water use          |                                                         | 2015-2050        |                        |                           | Hou et al., 2024        |
| Urban water use             |                                                         |                  |                        |                           |                         |
| Rural water use             |                                                         |                  |                        |                           |                         |
| Reservoir capacity          | Wang et al., 2022                                       | 1990-2050        | 10 years               | Shapefile                 |                         |
| Evaporation                 | ISIMIP                                                  | 2010-2050        | Month                  | 0.5°                      |                         |
| Surface runoff              |                                                         | 2015-2050        |                        |                           | Gou et al., 2021        |
| Groundwater recharge        |                                                         |                  |                        |                           |                         |
| Grain yield                 | GAEZ                                                    | 2015             | Year                   | 0.08333°                  |                         |
| Crop area                   |                                                         |                  |                        |                           | Tu et al., 2024         |
| Crop demand                 | Predicted based on production level, population         | 2015-2050        | Year                   | 0.08333°                  |                         |
| Industry electricity demand | Chen et al., 2022<br>Predicted based on population, GDP | 2015-2050        | Month                  | 1km                       |                         |
| Urban electricity demand    |                                                         |                  |                        |                           |                         |
| Rural electricity demand    |                                                         |                  |                        |                           |                         |
| Power plant capacity        | Global Power Plant Database                             | 2015-2020        | Year                   | Shapefile                 |                         |
| Population                  | Jones and O'Neill, 2016                                 | 2000-2050        | 10 years               | 0.125°                    |                         |
| Elevation, flow direction   | HydroSHEDS                                              |                  |                        | 0.004°                    |                         |

## References

- Chen, J., Gao, M., Cheng, S., Hou, W., Song, M., Liu, X., and Liu, Y.: Global 1 km × 1 km gridded revised real gross domestic product and electricity consumption during 1992–2019 based on calibrated nighttime light data, *Sci. Data*, 9, 202, <https://doi.org/10.1038/s41597-022-01322-5>, 2022.
- Gou, J., Miao, C., Samaniego, L., Xiao, M., Wu, J., and Guo, X.: CNRD v1.0: A High-Quality Natural Runoff Dataset for Hydrological and Climate Studies in China, *Bulletin of the American Meteorological Society*, 102, E929–E947, <https://doi.org/10.1175/BAMS-D-20-0094.1>, 2021.
- Hou, C., Li, Y., Sang, S., Zhao, X., Liu, Y., Liu, Y., and Zhao, F.: High-resolution mapping of monthly industrial water withdrawal in China from 1965 to 2020, *Earth System Science Data*, 16, 2449–2464, <https://doi.org/10.5194/essd-16-2449-2024>, 2024.
- Jones, B. and O’Neill, B. C.: Spatially explicit global population scenarios consistent with the Shared Socioeconomic Pathways, *Environ. Res. Lett.*, 11, 084003, <https://doi.org/10.1088/1748-9326/11/8/084003>, 2016.
- Khan, Z., Thompson, I., Vernon, C. R., Graham, N. T., Wild, T. B., and Chen, M.: Global monthly sectoral water use for 2010–2100 at 0.5° resolution across alternative futures, *Sci. Data*, 10, 201, <https://doi.org/10.1038/s41597-023-02086-2>, 2023.
- Tu, Y., Wu, S., Chen, B., Weng, Q., Bai, Y., Yang, J., Yu, L., and Xu, B.: A 30 m annual cropland dataset of China from 1986 to 2021, *Earth System Science Data*, 16, 2297–2316, <https://doi.org/10.5194/essd-16-2297-2024>, 2024.
- Wang, J., Walter, B. A., Yao, F., Song, C., Ding, M., Maroof, A. S., Zhu, J., Fan, C., McAlister, J. M., Sikder, S., Sheng, Y., Allen, G. H., Crétaux, J.-F., and Wada, Y.: GeoDAR: georeferenced global dams and reservoirs dataset for bridging attributes and geolocations, *Earth Syst. Sci. Data*, 14, 1869–1899, <https://doi.org/10.5194/essd-14-1869-2022>, 2022.
- Zhou, F., Bo, Y., Ciais, P., Dumas, P., Tang, Q., Wang, X., Liu, J., Zheng, C., Polcher, J., Yin, Z., Guimberteau, M., Peng, S., Otle, C., Zhao, X., Zhao, J., Tan, Q., Chen, L., Shen, H., Yang, H., Piao, S., Wang, H., and Wada, Y.: Deceleration of China’s human water use and its key drivers, *Proceedings of the National Academy of Sciences*, 117, 7702–7711, <https://doi.org/10.1073/pnas.1909902117>, 2020.
